# Supplementary material for: A new bifunctional electrochemical sensor for hydrogen peroxide and nitrite based on a bimetallic metalloporphyrinic framework
Source: Royal Society of Chemistry journal article supplement (doi:10.1039/c5tb01361e), 2015-01-01
Supplement: c5tb01361e1.pdf [file c5tb01361e1.pdf]

## Supporting Information

### **A new bifunctional electrochemical sensor for hydrogen peroxide and nitrite based on a bimetallic metalloporphyrinic framework**

Li-Mei Shi, Jing-Xiong Pan, Bo Zhou\*, Xiaoqing Jiang\*

*Jiangsu Key Laboratory of New Power Batteries, National-Local Joint Engineering Research Center for Biomedical Functional Materials, Jiangsu Collaborative Innovation Center of Biomedical Functional Materials, Jiangsu Key Laboratory of Biomedical Materials, College of Chemistry and Materials Science, Nanjing Normal University, Nanjing 210023, 1 Wenyuan Road, P. R. China*

\*Corresponding authors: Bo Zhou, Xiaoqing Jiang

E-mail: zhoubo@njnu.edu.cn, jiangxiaoqing@njnu.edu.cn

Phone number: +86 25 85891707

Fax: +86 25 85891767

Postal address: College of Chemistry and Materials Science, Nanjing Normal University, Nanjing 210023, 1 Wenyuan Road, P. R. China.

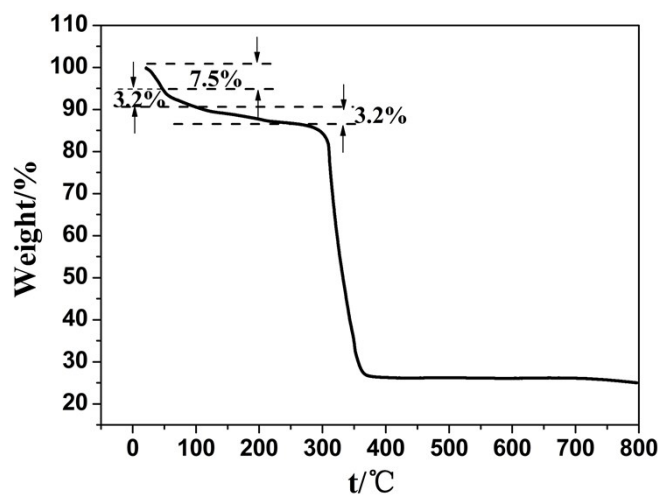

Fig. S1 TGA curve of as-prepared  $[\text{Cu}_2(\text{Co-TCPP})(\text{H}_2\text{O})_2] \cdot 0.5\text{DMF} \cdot 5\text{H}_2\text{O}$

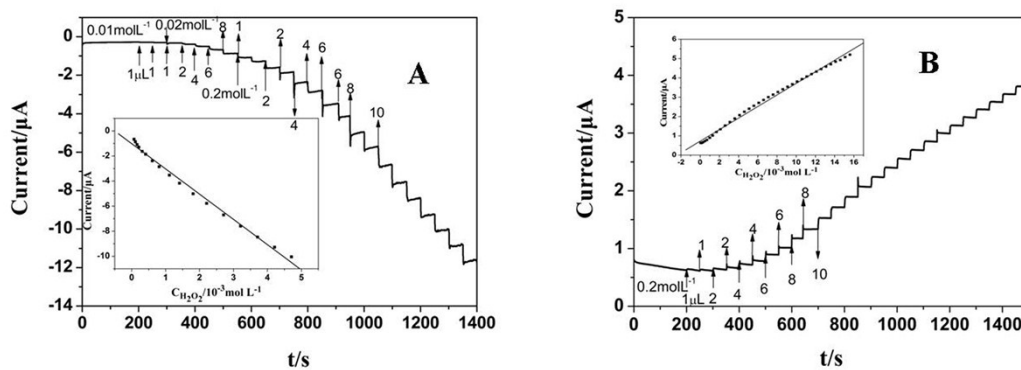

Fig. S2 Amperometric responses of Cu-CoTCPP/GCE to successive addition of  $\text{H}_2\text{O}_2$  in 4 mL  $\text{N}_2$ -saturated PBS (0.1 M, pH 7.0) at -0.25 V (A) and 0.85 V (B). The inset shows the current response to the  $\text{H}_2\text{O}_2$  concentration.

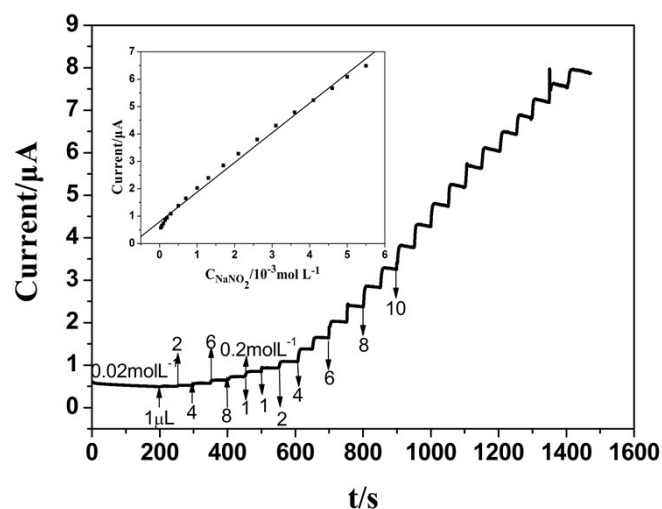

Fig. S3 Amperometric responses of Cu-CoTCPP/GC electrode to successive addition of NaNO<sub>2</sub> in 4 mL N<sub>2</sub>-saturated PBS (0.1 M, pH 7.0) at an applied potential of 0.85V. The inset shows the current response to the NaNO<sub>2</sub> concentration.

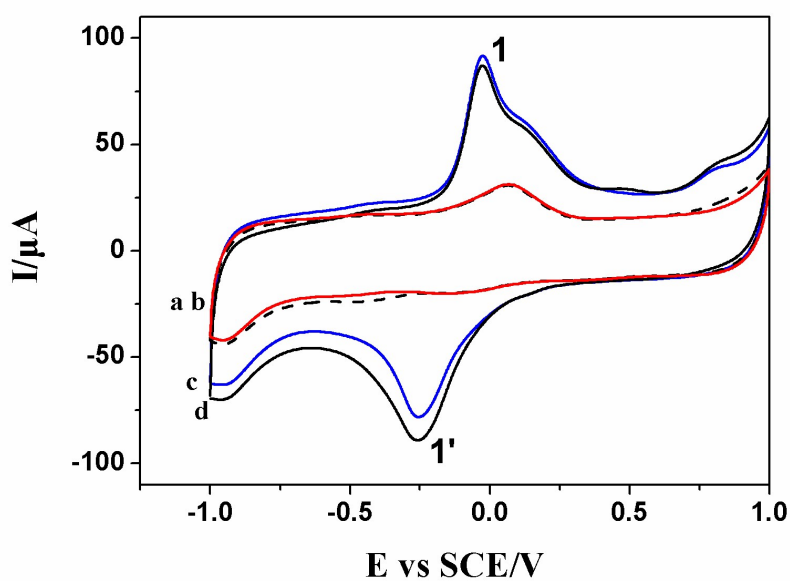

Fig. S4 CVs of MWCNT/GCE without H<sub>2</sub>O<sub>2</sub> (a, red solid curve), with 0.5 mmol L<sup>-1</sup> H<sub>2</sub>O<sub>2</sub> (b, black dash curve), Cu-CoTCPP/MWCNT/GC electrode without H<sub>2</sub>O<sub>2</sub> (c, blue solid curve), and with 0.5 mmol L<sup>-1</sup> H<sub>2</sub>O<sub>2</sub> (d, black solid curve) in 4 mL N<sub>2</sub>-saturated PBS (0.1 M, pH 7.0). The scan rate: 100 mVs<sup>-1</sup>.

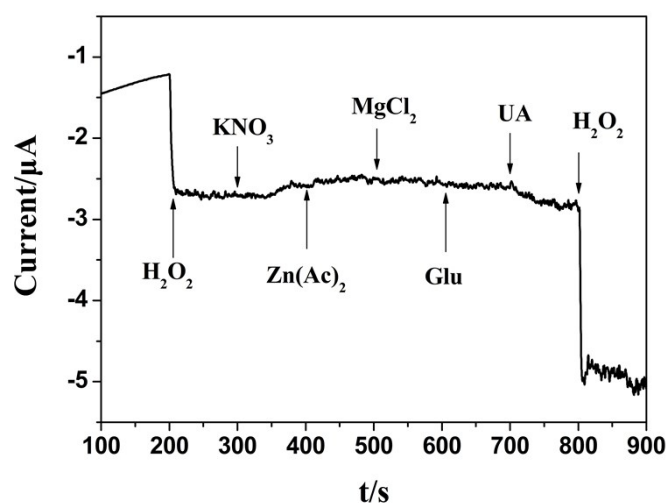

Fig. S5 The selectivity profile of electrode over interfering species of  $\text{H}_2\text{O}_2$  ( $0.5 \text{ mmol L}^{-1}$ ),  $\text{KNO}_3$  ( $0.5 \text{ mmol L}^{-1}$ ),  $\text{Zn}(\text{Ac})_2$  ( $0.5 \text{ mmol L}^{-1}$ ),  $\text{MgCl}_2$  ( $0.5 \text{ mmol L}^{-1}$ ),  $\text{Glu}$  ( $0.5 \text{ mmol L}^{-1}$ ),  $\text{UA}$  ( $0.5 \text{ mmol L}^{-1}$ ) obtained at  $-0.25 \text{ V}$  in  $\text{N}_2$ -saturated  $\text{PBS}$  ( $0.1 \text{ mol L}^{-1}$ ,  $\text{pH } 7.0$ ).

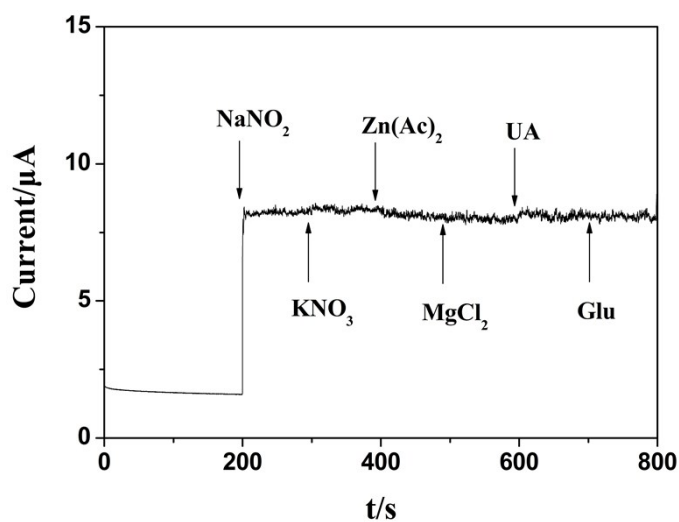

Fig. S6 The selectivity profile of electrode over interfering species of  $\text{NaNO}_2$  ( $0.5 \text{ mmol L}^{-1}$ ),  $\text{KNO}_3$  ( $0.5 \text{ mmol L}^{-1}$ ),  $\text{Zn}(\text{Ac})_2$  ( $0.5 \text{ mmol L}^{-1}$ ),  $\text{MgCl}_2$  ( $0.5 \text{ mmol L}^{-1}$ ),  $\text{UA}$  ( $0.5 \text{ mmol L}^{-1}$ ),  $\text{Glu}$  ( $0.5 \text{ mmol L}^{-1}$ ) obtained at  $0.85 \text{ V}$  in  $\text{N}_2$ -saturated  $\text{PBS}$  ( $0.1 \text{ mol L}^{-1}$ ,  $\text{pH } 7.0$ ).

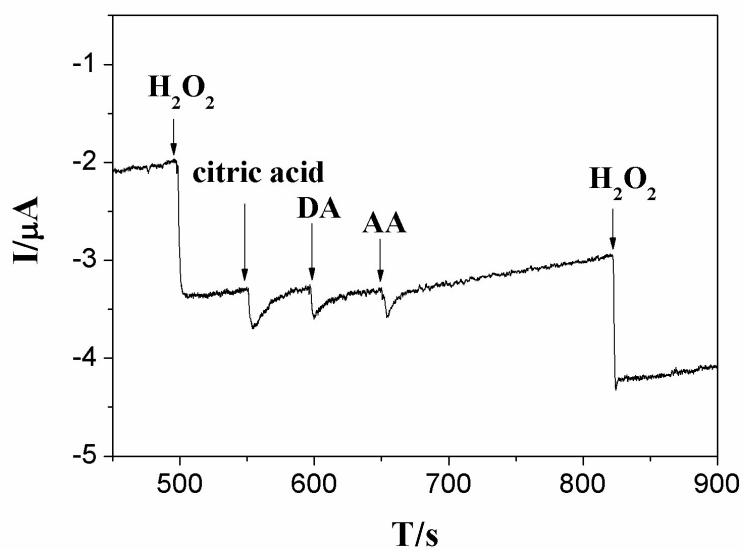

Fig. S7 The selectivity profile of electrode over interfering species of  $\text{H}_2\text{O}_2$  ( $0.5 \text{ mmol L}^{-1}$ ), citric acid ( $0.5 \text{ mmol L}^{-1}$ ), DA ( $0.5 \text{ mmol L}^{-1}$ ), AA ( $0.5 \text{ mmol L}^{-1}$ ) obtained at  $-0.25 \text{ V}$  in  $\text{N}_2$ -saturated PBS ( $0.1 \text{ mol L}^{-1}$ , pH 7.0).

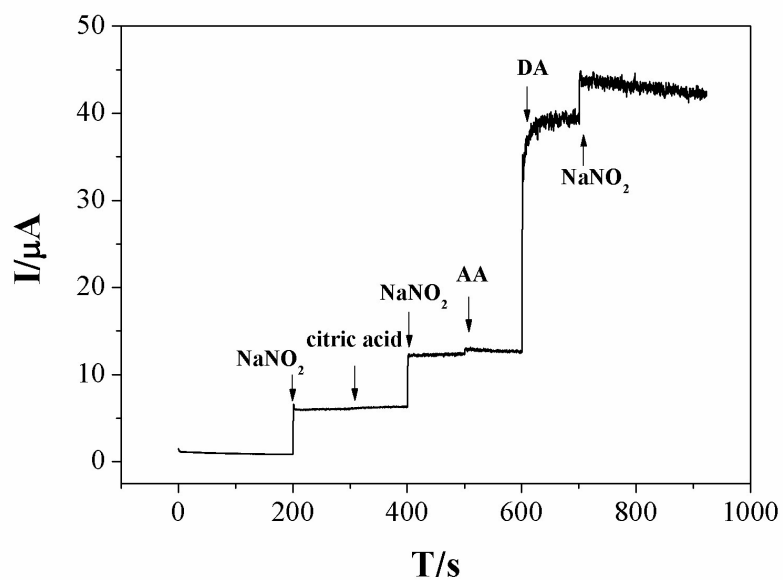

Fig. S8 The selectivity profile of electrode over interfering species of  $\text{NaNO}_2$  ( $0.5 \text{ mmol L}^{-1}$ ), citric acid ( $0.5 \text{ mmol L}^{-1}$ ), DA ( $0.5 \text{ mmol L}^{-1}$ ), AA ( $0.5 \text{ mmol L}^{-1}$ ) obtained at  $0.85 \text{ V}$  in  $\text{N}_2$ -saturated PBS ( $0.1 \text{ mol L}^{-1}$ , pH 7.0).
